# Supplementary material
Source: PubMed Central journal article supplement (PMC6145652)
Supplement: jamadermatol-154-701-s001.pdf [file jamadermatol-154-701-s001.pdf]

## Supplementary Online Content

Wang DM, Kraft S, Rohani P, et al. Association of nodal metastasis and mortality with vermilion vs cutaneous lip location in cutaneous squamous cell carcinoma of the lip. *JAMA Dermatol*. Published online May 2, 2018. doi:10.1001/jamainternmed.2018.0792

**eTable 1.** ICD-9 Codes for Cutaneous Squamous Cell Carcinoma of the Lip

**eTable 2.** Univariable and Multivariable Analyses for Selected Outcomes of Interest

This supplementary material has been provided by the authors to give readers additional information about their work.

**eTable 1. ICD-9 Codes for Cutaneous Squamous Cell Carcinoma of the Lip**

| <b>ICD-9 code</b> | <b>Diagnosis</b>                                         |
|-------------------|----------------------------------------------------------|
| 140.0             | Malignant neoplasm of upper lip, vermilion border        |
| 140.1             | Malignant neoplasm of lower lip, vermilion border        |
| 140.3             | Malignant neoplasm of upper lip, inner aspect            |
| 140.4             | Malignant neoplasm of lower lip, inner aspect            |
| 140.5             | Malignant neoplasm of lip, unspecified, inner aspect     |
| 140.6             | Malignant neoplasm of commissure of lip                  |
| 140.8             | Malignant neoplasm of other sites of lip                 |
| 140.9             | Malignant neoplasm of lip, unspecified, vermilion border |
| 173.0             | Other malignant neoplasm of skin of lip                  |
| 173.00            | Unspecified malignant neoplasm of skin of lip            |
| 173.02            | Squamous cell carcinoma of skin of lip                   |
| 173.09            | Other specified malignant neoplasm of skin of lip        |

*ICD-9*, International Classification of Diseases, 9<sup>th</sup> Revision.

**eTable 2. Univariable and Multivariable Analyses for Selected Outcomes of Interest**

| Characteristic                                                                                       | Nodal metastasis     |         |                        |         | Disease-specific death |         |                        |         |
|------------------------------------------------------------------------------------------------------|----------------------|---------|------------------------|---------|------------------------|---------|------------------------|---------|
|                                                                                                      | Univariable analysis |         | Multivariable analysis |         | Univariable analysis   |         | Multivariable analysis |         |
|                                                                                                      | SHR (95% CI)         | P value | SHR (95% CI)           | P value | SHR (95% CI)           | P value | SHR (95% CI)           | P value |
| <b>Sex</b>                                                                                           |                      |         |                        |         |                        |         |                        |         |
| Female                                                                                               | 1 [Reference]        |         |                        |         | 1 [Reference]          |         |                        |         |
| Male                                                                                                 | 1.5 (0.5-4.3)        | .43     |                        |         | 1.7 (0.5-5.8)          | .42     |                        |         |
| <b>Age, y</b>                                                                                        |                      |         |                        |         |                        |         |                        |         |
| <70                                                                                                  | 1 [Reference]        |         | 1 [Reference]          |         | 1 [Reference]          |         |                        |         |
| ≥70                                                                                                  | 2.0 (0.7-5.6)        | .19     | 2.3 (0.8-6.5)          | .13     | 1.4 (0.4-4.6)          | .63     |                        |         |
| <b>Immunosuppression</b>                                                                             |                      |         |                        |         |                        |         |                        |         |
| No                                                                                                   | 1 [Reference]        |         |                        |         | 1 [Reference]          |         |                        |         |
| Yes                                                                                                  | 0.4 (0.1-1.9)        | .26     |                        |         | 0.7 (0.2-3.4)          | .69     |                        |         |
| <b>Previous skin cancer</b>                                                                          |                      |         |                        |         |                        |         |                        |         |
| No                                                                                                   | 1 [Reference]        |         |                        |         | 1 [Reference]          |         |                        |         |
| Yes                                                                                                  | 0.6 (0.2-1.8)        | .40     |                        |         | 0.5 (0.1-1.8)          | .27     |                        |         |
| <b>Lip location</b>                                                                                  |                      |         |                        |         |                        |         |                        |         |
| Cutaneous lip                                                                                        | 1 [Reference]        |         | 1 [Reference]          |         | 1 [Reference]          |         | 1 [Reference]          |         |
| Vermilion lip                                                                                        | 5.6 (1.3-25.1)       | .02     | 5.0 (1.1-23.8)         | .04     | 1.4 (0.4-5.3)          | .59     | 0.8 (0.2-3.5)          | .78     |
| <b>Tumor diameter, cm</b>                                                                            |                      |         |                        |         |                        |         |                        |         |
| <2                                                                                                   | 1 [Reference]        |         |                        |         | 1 [Reference]          |         |                        |         |
| ≥2                                                                                                   | 1.3 (0.3-5.8)        | .74     |                        |         | 2.0 (0.4-9.4)          | .40     |                        |         |
| <b>Tumor differentiation</b>                                                                         |                      |         |                        |         |                        |         |                        |         |
| Well                                                                                                 | 1 [Reference]        |         |                        |         | 1 [Reference]          |         |                        |         |
| Moderate                                                                                             | 2.9 (1.0-8.9)        | .06     |                        |         | 1.5 (0.3-7.6)          | .60     |                        |         |
| Poor                                                                                                 | 3.6 (0.8-17.2)       | .11     |                        |         | 5.4 (1.1-26.6)         | .04     |                        |         |
| <b>Level of invasion</b>                                                                             |                      |         |                        |         |                        |         |                        |         |
| Dermis or subcutaneous fat                                                                           | 1 [Reference]        |         | 1 [Reference]          |         | 1 [Reference]          |         |                        |         |
| Beyond subcutaneous fat<br>(For vermilion cases, beyond<br>dermis e.g. fascia or muscle<br>invasion) | 4.5 (1.4-14.1)       | .01     | 4.4 (1.3-14.9)         | .02     | 5.7 (1.5-22.0)         | .01     |                        |         |
| <b>Perineural invasion</b>                                                                           |                      |         |                        |         |                        |         |                        |         |
| No                                                                                                   | 1 [Reference]        |         |                        |         | 1 [Reference]          |         | 1 [Reference]          |         |
| Yes                                                                                                  | 1.0 (0.1-7.4)        | .99     |                        |         | 6.6 (1.7-25.9)         | .007    | 4.6 (1.1-18.9)         | .04     |
| <b>BWH T stage</b>                                                                                   |                      |         |                        |         |                        |         |                        |         |
| T1/T2a (Low)                                                                                         | 1 [Reference]        |         |                        |         | 1 [Reference]          |         |                        |         |
| T2b/T3 (High)                                                                                        | 1.4 (0.2-10.8)       | .72     |                        |         | 2.6 (0.3-21.4)         | .37     |                        |         |

**eTable 2. Univariable and Multivariable Analyses for Selected Outcomes of Interest (continued)**

| Characteristic (continued) | Nodal metastasis     |         |                        |         | Disease-specific death |         |                        |         |
|----------------------------|----------------------|---------|------------------------|---------|------------------------|---------|------------------------|---------|
|                            | Univariable analysis |         | Multivariable analysis |         | Univariable analysis   |         | Multivariable analysis |         |
|                            | SHR (95% CI)         | P value | SHR (95% CI)           | P value | SHR (95% CI)           | P value | SHR (95% CI)           | P value |
| <b>AJCC 8 T stage</b>      |                      |         |                        |         |                        |         |                        |         |
| T1/T2 (Low)                | 1 [Reference]        |         |                        |         | 1 [Reference]          |         |                        |         |
| T3/T4a,b (High)            | 4.0 (1.3-12.4)       | .02     |                        |         | 5.1 (1.3-19.3)         | .02     |                        |         |
| <b>Treatment modality</b>  |                      |         |                        |         |                        |         |                        |         |
| Standard excision          | 1 [Reference]        |         |                        |         | 1 [Reference]          |         | 1 [Reference]          |         |
| Mohs surgery               | 0.4 (0.1-1.1)        | .07     |                        |         | 0.1 (0.0-0.6)          | .009    | 0.1 (0.0-0.7)          | .02     |
| Other treatment            | 0.9 (0.2-3.5)        | .90     |                        |         | 0.7 (0.1-3.4)          | .66     | 0.5 (0.1-2.8)          | .43     |

SHR, subhazard ratio; CI, confidence interval; BWH, Brigham and Women's Hospital; T, tumor stage from TNM staging system; AJCC 8, American Joint Committee on Cancer, Cancer Staging Manual, 8<sup>th</sup> Edition.
